# Supplementary material for: MELOGEN: an EST database for melon functional genomics
Source: PubMed Central journal article supplement (PMC2034596; doi:10.1186/1471-2164-8-306), 2007-09-03
Supplement: 1471-2164-8-306-S1.pdf [file 1471-2164-8-306-S1.pdf]

## Additional file 1

**Genes potentially encoding pathogen resistance and fruit quality traits.** Genes were identified in the melon data set by comparison with the Arabidopsis database [6]. A brief description, the corresponding Arabidopsis locus and the HMMR domain identified are given for each unigene.

| gene name <sup>a</sup> | description                                                                | Arabidopsis locus | Melogen unigene    | HMMR domain   |
|------------------------|----------------------------------------------------------------------------|-------------------|--------------------|---------------|
| <i>OFP6</i>            | ovate protein                                                              | AT3G52525         | bCL2403Contig1     | --            |
| <i>OFP1</i>            | ovate protein                                                              | AT5G01840         | bCL5705Contig1     | --            |
| <i>OFP2</i>            | ovate protein                                                              | AT2G30400         | bCL1523Contig1     | DUF623        |
| <i>OFP13</i>           | ovate protein                                                              | AT5G04820         | bCL5616Contig1     | DUF623        |
| <i>F10B6_27</i>        | ORFX homolog1 (fw2.2 encoding ORF), expressed protein, similar to PGPS/D12 | AT1G14870         | bCL2140Contig1     | --            |
| <i>F9I5_19</i>         | ORFX homolog 2 expressed protein, similar to PGPS/D12                      | AT1G52200         | bCL906Contig1      | PLAC8         |
| --                     | expressed protein, low similarity to PGPS/D12                              | AT2G40935         | bAI_04-D10-M13R    | --            |
| <i>SPL3</i>            | SPB-box gene, identical to squamosa-promoter binding protein like 3        | AT2G33810         | bCL2523Contig1     | --            |
| <i>MBA10_13</i>        | SPB-box gene, similar to squamosa promoter binding protein-like 9          | AT5G50570         | bPSI_29-H01-M13R_c | --            |
| <i>SPL7</i>            | SPB-box gene, identical to squamosa promoter binding protein-like 7        | AT5G18830         | bCI_30-F06-M13R_c  | --            |
| <i>CLA1</i>            | 1-deoxy-D-xylulose-5-phosphate synthase                                    | AT4G15560         | bAI_15-G04-M13R_c  | Transket_pyr  |
| <i>IPP2</i>            | IPP synthase1, isopentenyl diphosphate:dimethylallyl diphosphate isomerase | AT3G02780         | bCL426Contig1      | NUDIX         |
| <i>GGR</i>             | geranylgeranyl pyrophosphate synthase1                                     | AT4G38460         | bCL4889Contig1     | --            |
| <i>PSY</i>             | phytoene synthase homolog1                                                 | AT5G17230         | bHS_38-F04-M13R_c  | SQS_PSY       |
| <i>PDS3</i>            | Phytoene Desaturase homolog                                                | AT4G14210         | bA_12-A10-M13R_c   | --            |
| <i>ZDS</i>             | zeta-carotene desaturase                                                   | AT3G04870         | bCL1279Contig1     | --            |
| <i>CRTISO</i>          | carotenoid isomerase                                                       | AT1G06820         | bCL1438Contig1     | --            |
| <i>LUT2</i>            | lycopene epsilon cyclase                                                   | AT5G57030         | bCL3563Contig1     | Lycopene_cycl |
| <i>CCD1</i>            | carotenoid cleavage dioxygenase 1                                          | AT3G63520         | bCL5417Contig1     | RPE65         |
| <i>EIN2</i>            | ethylene-insensitive 2 (EIN2)                                              | AT5G03280         | bPS_03-F02-M13R_c  | --            |

| gene name <sup>a</sup> | description                                                            | Arabidopsis locus | Melogen unigene    | HMMR domain               |
|------------------------|------------------------------------------------------------------------|-------------------|--------------------|---------------------------|
| <i>EIN3</i>            | ethylene-insensitive 3 (EIN3)                                          | AT3G20770         | bCL204Contig2      | --                        |
| <i>EIN4</i>            | Ethylene receptor, subfamily 2 (EIN4)                                  | AT3G04580         | bCL1742Contig1     | Response_reg              |
| <i>EIN1</i>            | ethylene receptor 1 (ETR1)                                             | AT1G66340         | bCI_54-H09-M13R_c  | Response_reg              |
| <i>ACS5</i>            | 1-aminocyclopropane-1-carboxylic acid (ACC) synthase (ACS)             | AT5G65800         | bA_02-A09-M13R_c   | --                        |
| <i>ACS6</i>            | 1-aminocyclopropane-1-carboxylic acid (ACC) synthase (ACS)             | AT4G11280         | bPSI_39-H08-M13R_c | --                        |
| <i>ACS10</i>           | 1-aminocyclopropane-1-carboxylate synthase, putative / ACC synthase    | AT1G62960         | b15d_41-D01-M13R_c | --                        |
| <i>EAT1</i>            | 1-aminocyclopropane-1-carboxylate oxidase / ACC oxidase                | AT1G05010         | bCL4859Contig1     | 2OG-FeII_Oxy              |
| <i>ACO1</i>            | ACO1 1-aminocyclopropane-1-carboxylate oxidase, putative / ACC oxidase | AT2G19590         | bCL4923Contig1     | 2OG-FeII_Oxy              |
| <i>EXPA4</i>           | expansin, putative (EXP4) / <i>LeEXP1</i> in tomato                    | AT2G39700         | bAI_15-F08-M13R_c  | DPBB_1<br>Pollen_allerg_1 |
| <i>EXPA13</i>          | expansin, putative (EXP13)                                             | AT3G03220         | bA_39-E05-M13R_c   | DPBB_1<br>Pollen_allerg_1 |
| <i>EXPL2</i>           | expansin family protein (EXPL2)                                        | AT4G38400         | bCL1936Contig1     | DPBB_1<br>Pollen_allerg_1 |
| <i>EXP7</i>            | expansin, putative (EXP7)                                              | AT1G12560         | bPSI_29-G12-M13R_c | DPBB_1<br>Pollen_allerg_1 |
| <i>BGAL1</i>           | beta-galactosidase, putative / TBG4                                    | AT3G13750         | bPS_15-D10-M13R_c  | --                        |
| <i>XTR4</i>            | endo-xyloglucan transferase, putative (XTR4)                           | AT1G32170         | bA_15-E06-M13R_c   | XET_C                     |
| <i>XTR2</i>            | endo-xyloglucan transferase (XTR2)                                     | AT1G14720         | bCL2427Contig1     | Glyco_hydro_16            |
| <i>F18B13_25</i>       | Polygalacturonase                                                      | AT1G80170         | b15d_11-F07-M13R_c | --                        |
| <i>F28C11.9</i>        | Polygalacturonase                                                      | AT1G23460         | bA_05-G07-M13R_c   | --                        |
| <i>F26K9.250</i>       | invertase/pectin methylesterase inhibitor family protein               | AT3G62820         | bCI_66-D03-M13R_c  | PMEI                      |
| <i>MMI9_21</i>         | invertase/pectin methylesterase inhibitor family protein               | AT5G62350         | bCL3362Contig1     | PMEI                      |
| <i>F26F24_4</i>        | invertase/pectin methylesterase inhibitor family protein               | AT1G23205         | bAI_30-D12-M13R_c  | PMEI                      |
| <i>C/VIF2</i>          | invertase/pectin methylesterase inhibitor family protein               | AT5G64620         | bCL1489Contig1     | PMEI                      |
| <i>MMI9_1</i>          | invertase/pectin methylesterase inhibitor family protein               | AT5G62360         | bCL2148Contig1     | PMEI                      |
| <i>F25I16_1</i>        | endoglucanase homolog2                                                 | AT1G18650         | bCL4503Contig1     | X8                        |

| gene name <sup>a</sup> | description                                                                                                                                                                                                                                                         | Arabidopsis locus | Melogen unigene    | HMMR domain     |
|------------------------|---------------------------------------------------------------------------------------------------------------------------------------------------------------------------------------------------------------------------------------------------------------------|-------------------|--------------------|-----------------|
| <i>SVP</i>             | Jointless-like MADS-box gene, short vegetative phase protein (SVP)                                                                                                                                                                                                  | AT2G22540         | bCL2852Contig1     | SRF-TF          |
| <i>PI</i>              | MADS-box gene, floral homeotic protein PISTILLATA (PI)                                                                                                                                                                                                              | AT5G20240         | bPSI_33-F04-M13R_c | SRF-TF          |
| <i>AG</i>              | MADS-box gene, floral homeotic protein AGAMOUS (AG)                                                                                                                                                                                                                 | AT4G18960         | bCL1793Contig1     | K-box<br>SRF-TF |
| <i>AGL9</i>            | SEPALLATA3-like MADS-box gene (AGL9)                                                                                                                                                                                                                                | AT1G24260         | bCL5089Contig1     | K-box<br>SRF-TF |
| <i>AGL20</i>           | AGL20/SOC1-like MADS-box gene                                                                                                                                                                                                                                       | AT2G45660         | bAI_10-F02-M13R_c  | K-box<br>SRF-TF |
| <i>AGL12</i>           | AGL12-like MADS-box gene                                                                                                                                                                                                                                            | AT1G71692         | bCL2951Contig1     | SRF-TF          |
| <i>MUF9_24</i>         | AGL62-like MADS-box gene                                                                                                                                                                                                                                            | AT5G60440         | bPSI_24-C03-M13R_c | SRF-TF          |
| <i>AP3</i>             | APETALA3-like MADS-box gene                                                                                                                                                                                                                                         | AT3G54340         | b46d_11-A08-M13R_c | SRF-TF<br>K-box |
| <i>F13I12.140</i>      | leucine-rich repeat transmembrane protein kinase, putative, receptor kinase-like protein (Xa21)                                                                                                                                                                     | AT3G47090         | bAI_21-G07-M13R_c. | --              |
| <i>FLS2</i>            | Encodes a leucine-rich repeat serine/threonine protein kinase. FLS2 is involved in MAP kinase signalling relay involved in innate immunity                                                                                                                          | AT5G46330         | bCI_24-G04-M13R_c  | LRR_1           |
| <i>AtGSNOR1</i>        | Encodes a glutathione-dependent formaldehyde dehydrogenase (also known as class III type alcohol dehydrogenase)                                                                                                                                                     | AT5G43940         | bCL3263Contig1     | --              |
| <i>EDS1</i>            | Component of R gene-mediated disease resistance in arabidopsis with homology to eukaryotic lipases                                                                                                                                                                  | AT3G48090         | bCL3165Contig1     | --              |
| <i>SAG101</i>          | encodes an acyl hydrolase involved in senescence                                                                                                                                                                                                                    | AT5G14930         | bAI_26-E10-M13R_c  | --              |
| <i>PR-1-LIKE</i>       | Encodes a PR-1-like protein. Though the Genbank record for the cDNA associated to this gene model is called 'PR-1', the sequence actually corresponds to PR-1-like allergen V5/Tpx-1-related family protein, similar to pathogenesis-related protein PR-1 precursor | AT2G19990         | bCL4983Contig1.    | SCP             |
| <i>F17I23_340</i>      | pathogenesis-related protein, putative, similar to gene PR-1 protein                                                                                                                                                                                                | AT4G30320         | bCL820Contig1      | SCP             |
| <i>F14M19_60</i>       | encodes a member of glycosyl hydrolase family 17 / Beta-1,3-glucanase 1                                                                                                                                                                                             | AT4G25780         | b15d_08-H10-M13R_c | SCP             |
| <i>BG1</i>             |                                                                                                                                                                                                                                                                     | AT3G57270         | bCI_21-B07-M13R_c  | Glyco_hydro_17  |
| <i>BG3</i>             | Beta-1,3-glucanase 3                                                                                                                                                                                                                                                | AT3G57240         | bCI_27-F09-M13R_c  | Glyco_hydro_17  |
| <i>PR3</i>             | encodes a basic chitinase involved in ethylene/jasmonic acid mediated signalling pathway during systemic acquired resistance based on expression analyses.                                                                                                          | AT3G12500         | bAI_22-B05-M13R_c  | Glyco_hydro_19  |
| <i>T15B16_5</i>        | chitinase, putative, similar to type II chitinase                                                                                                                                                                                                                   | AT4G01700         | bAI_37-E08-M13R_c  | Glyco_hydro_19  |
| <i>CTL1</i>            | chitinase-like protein 1 (CTL1), similar to class I chitinase                                                                                                                                                                                                       | AT1G05850         | bCL1465Contig1     | Glyco_hydro_19  |
| <i>T9A14.6</i>         | similar to thaumatin-like protein                                                                                                                                                                                                                                   | AT4G38660         | bHS_08-A04-M13R_c  | Thaumatoin      |

| gene name <sup>a</sup> | description                                                                                                                                                                              | Arabidopsis locus | Melogen unigene    | HMMR domain     |
|------------------------|------------------------------------------------------------------------------------------------------------------------------------------------------------------------------------------|-------------------|--------------------|-----------------|
| <i>T20H2_19</i>        | pathogenesis-related thaumatin family protein, similar to receptor serine/threonine kinase PR5K                                                                                          | AT1G20030         | bPSI_27-C07-M13R_c | Thaumatin       |
| <i>CSD1</i>            | Encodes a cytosolic copper/zinc superoxide dismutase CSD1                                                                                                                                | AT1G08830         | bCL306Contig2      | Sod_Cu          |
| <i>GST6</i>            | glutathione S-transferase 6 (GST6)                                                                                                                                                       | AT2G47730         | bCL733Contig1      | GST_N<br>GST_C  |
| <i>GST18</i>           | Encodes glutathione transferase belonging to the zeta class of GSTs                                                                                                                      | AT2G02390         | bCL2573Contig1     | GST_N           |
| <i>GST25</i>           | Encodes glutathione transferase belonging to the tau class of GSTs. Induced by Salicylic acid                                                                                            | AT2G29420         | bCL3039Contig1     | GST_N           |
| <i>GST6</i>            | Encodes glutathione transferase belonging to the phi class of GSTs. Glutathione S-transferase 6 (GST6)                                                                                   | AT2G47730         | bCL733Contig1      | GST_N<br>GST_C  |
| --                     | ribonuclease III family protein, similar to CAF protein (RNA helicase/RNaseIII)                                                                                                          | AT4G15417         | bPS_15-E03-M13R_c  | Ribonuclease_3  |
| <i>DCL1</i>            | Encodes a Dicer homolog. Dicer is a RNA helicase involved in microRNA processing                                                                                                         | AT1G01040         | bPS_15-E03-M13R_c  | --              |
| <i>AGO1</i>            | Encodes an RNA Slicer that selectively recruits microRNAs and siRNAs. There is currently no evidence that AGO1 Slicer is in a high molecular weight RNA-induced silencing complex (RISC) | AT1G48410         | bCL2045Contig1     | Piwi            |
| <i>F6F22_4</i>         | RNA-dependent RNA polymerase family protein                                                                                                                                              | AT2G19930         | bAI_27-E08-M13R_c  | --              |
| <i>RDR6</i>            | Encodes RNA-dependent RNA polymerase. Involved in trans-acting siRNA and other siRNA biogenesis. Required for post-transcriptional gene silencing and natural virus resistance.          | AT3G49500         | bHS_19-D11-M13R_c  | --              |
| <i>RDR2</i>            | Encodes RNA-dependent RNA polymerase that is required for endogenous siRNA (but not miRNA) formation.                                                                                    | AT4G11130         | bCL3286Contig1     | --              |
| <i>T31K7_7</i>         | 30S ribosomal protein, putative, similar to plastid-specific 30S ribosomal protein 1, chloroplast precursor (CS-S5) (CS5) (S22) (Ribosomal protein 1) (PSRP-1)                           | AT5G24490         | bCL4287Contig1     | Ribosomal_S30AE |
| <i>F24J5_17</i>        | plastid-specific 30S ribosomal protein 3, putative / PSRP-3                                                                                                                              | AT1G68590         | bCL864Contig1      | PSRP-3_Ycf65    |
| <i>EIF4E</i>           | eukaryotic translation initiation factor 4E                                                                                                                                              | AT4G18040         | bCL4710Contig1     | IF4E            |
| <i>EIF(ISO)4E</i>      | eukaryotic translation initiation factor 4E, cap-binding protein                                                                                                                         | AT5G35620         | bCL1086Contig1     | IF4E            |
| <i>NCBP</i>            | novel cap-binding protein (nCBP)                                                                                                                                                         | AT5G18110         | bCL183Contig1      | IF4E            |
| <i>EIF4G</i>           | eukaryotic translation initiation factor 4G                                                                                                                                              | AT3G60240         | bCL1676Contig1     | --              |
| <i>TOM1</i>            | encodes a host factor that is required for TMV virus multiplication.                                                                                                                     | AT4G21790         | bPS_10-H03-M13R_c  | DUF1084         |
| <i>TOM2A</i>           | TOM2A encodes a 280 amino acid putative four-pass transmembrane protein with a C-terminal farnesylation signal, essential for efficient multiplication of tobacco mosaic viruses.        | AT1G32400         | bCL3115Contig1     | --              |
| <i>TOM3</i>            | tobamovirus multiplication protein 3, putative TOM3, putative THH1                                                                                                                       | AT1G14530         | bPSI_36-E03-M13R_c | DUF1084         |

<sup>a</sup>Gene name according to nomenclature proposed in The Arabidopsis Information Resource (TAIR) [6].
